# Supplementary material for: Pulse oximetry-based capillary refilling evaluation predicts postoperative outcomes in liver transplantation: a prospective observational cohort study
Source: Springer Nature journal article supplement (doi:10.1186/s12871-020-01171-y), 2020-09-29
Supplement: MOESM1 [file 18429418]

Additional file 1. Preoperative baseline characteristics, graft conditions, surgery-related factors, clinical parameters at ICU admission after surgery.

| Variables                            |                                              |                    |            |
|--------------------------------------|----------------------------------------------|--------------------|------------|
| Recipient characteristics            | body mass index (kg/m <sup>2</sup> )         | 21.0 (19.0–24.4)   |            |
|                                      | primary disease                              |                    |            |
|                                      | HBV positive                                 | 2 (6.1%)           |            |
|                                      | HCV positive                                 | 3 (9.1%)           |            |
|                                      | autoimmune disease (PBC/PSC/AIH)             | 8 (24.2%)          |            |
|                                      | alcoholic                                    | 5 (15.2%)          |            |
|                                      | others                                       | 15 (45.5%)         |            |
|                                      | albumin (g/dL)                               | 2.8 (2.4–3.2)      |            |
|                                      | total bilirubin (mg/dL)                      | 2.3 (1.2–7.4)      |            |
|                                      | PT-INR                                       | 1.27 (1.10–1.57)   |            |
|                                      | Graft characteristics                        | living donor       | 27 (81.8%) |
|                                      |                                              | age (years)        | 43 (32–54) |
|                                      |                                              | male sex           | 8 (27.6%)  |
| graft volume vs. recipient's SLV (%) |                                              |                    |            |
| living donor                         |                                              | 44.2 (38.0–51.1)   |            |
| brain death donor                    |                                              | 114.0 (95.0–140.1) |            |
| GRWR (%)                             |                                              |                    |            |
| living donor                         |                                              | 0.89 (0.70–1.06)   |            |
| brain death donor                    | 2.29 (1.84–2.70)                             |                    |            |
| Operative factors                    | operating time (hour)                        | 10.4 (9.4–11.6)    |            |
|                                      | anhepatic phase (min)                        | 148 (137–194)      |            |
|                                      | graft ischemic time (min)                    | 140 (127–156)      |            |
|                                      | blood loss (mL)                              | 3640 (1835–6743)   |            |
|                                      | blood transfusion (ml)                       | 3000 (1600–5880)   |            |
|                                      | intraoperative fluid balance (mL)            | 3810 (2780–4978)   |            |
| Clinical parameters at ICU admission | body weight (kg)                             | 58.7 (54.6–70.3)   |            |
|                                      | pulmonary arterial systolic pressure (mmHg)  | 32 (25–39)         |            |
|                                      | central venous pressure (cmH <sub>2</sub> O) | 12 (9–15)          |            |
|                                      | central venous oxygen saturation (%) *       | 85 (84–89)         |            |
|                                      | pulse pressure variation (%) **              | 4 (3–6)            |            |
|                                      | hemoglobin (mg/dL)                           | 8.8 (8.2–9.7)      |            |

|                                         |                  |
|-----------------------------------------|------------------|
| hepatic arterial flow velocity (cm/sec) | 42.5 (31.7–66.5) |
| hepatic venous flow velocity (cm/sec)   | 36.8 (27.4–46.0) |

---

\*N=26, \*\*N=30

Summary statistics are reported as No. (%), medians (lower and upper quartiles).

PBC; primary biliary cirrhosis, PSC; primary sclerosing cholangitis, AIH; autoimmune hepatitis, SLV; standard liver volume, GRWR; graft to recipient weight ratio
