# Supplementary material for: Pulse oximetry-based capillary refilling evaluation predicts postoperative outcomes in liver transplantation: a prospective observational cohort study
Source: Springer Nature journal article supplement (doi:10.1186/s12871-020-01171-y), 2020-09-29

## Additional file 2.

Correlations of Q-CRT and  $\Delta A_b$  with clinical parameters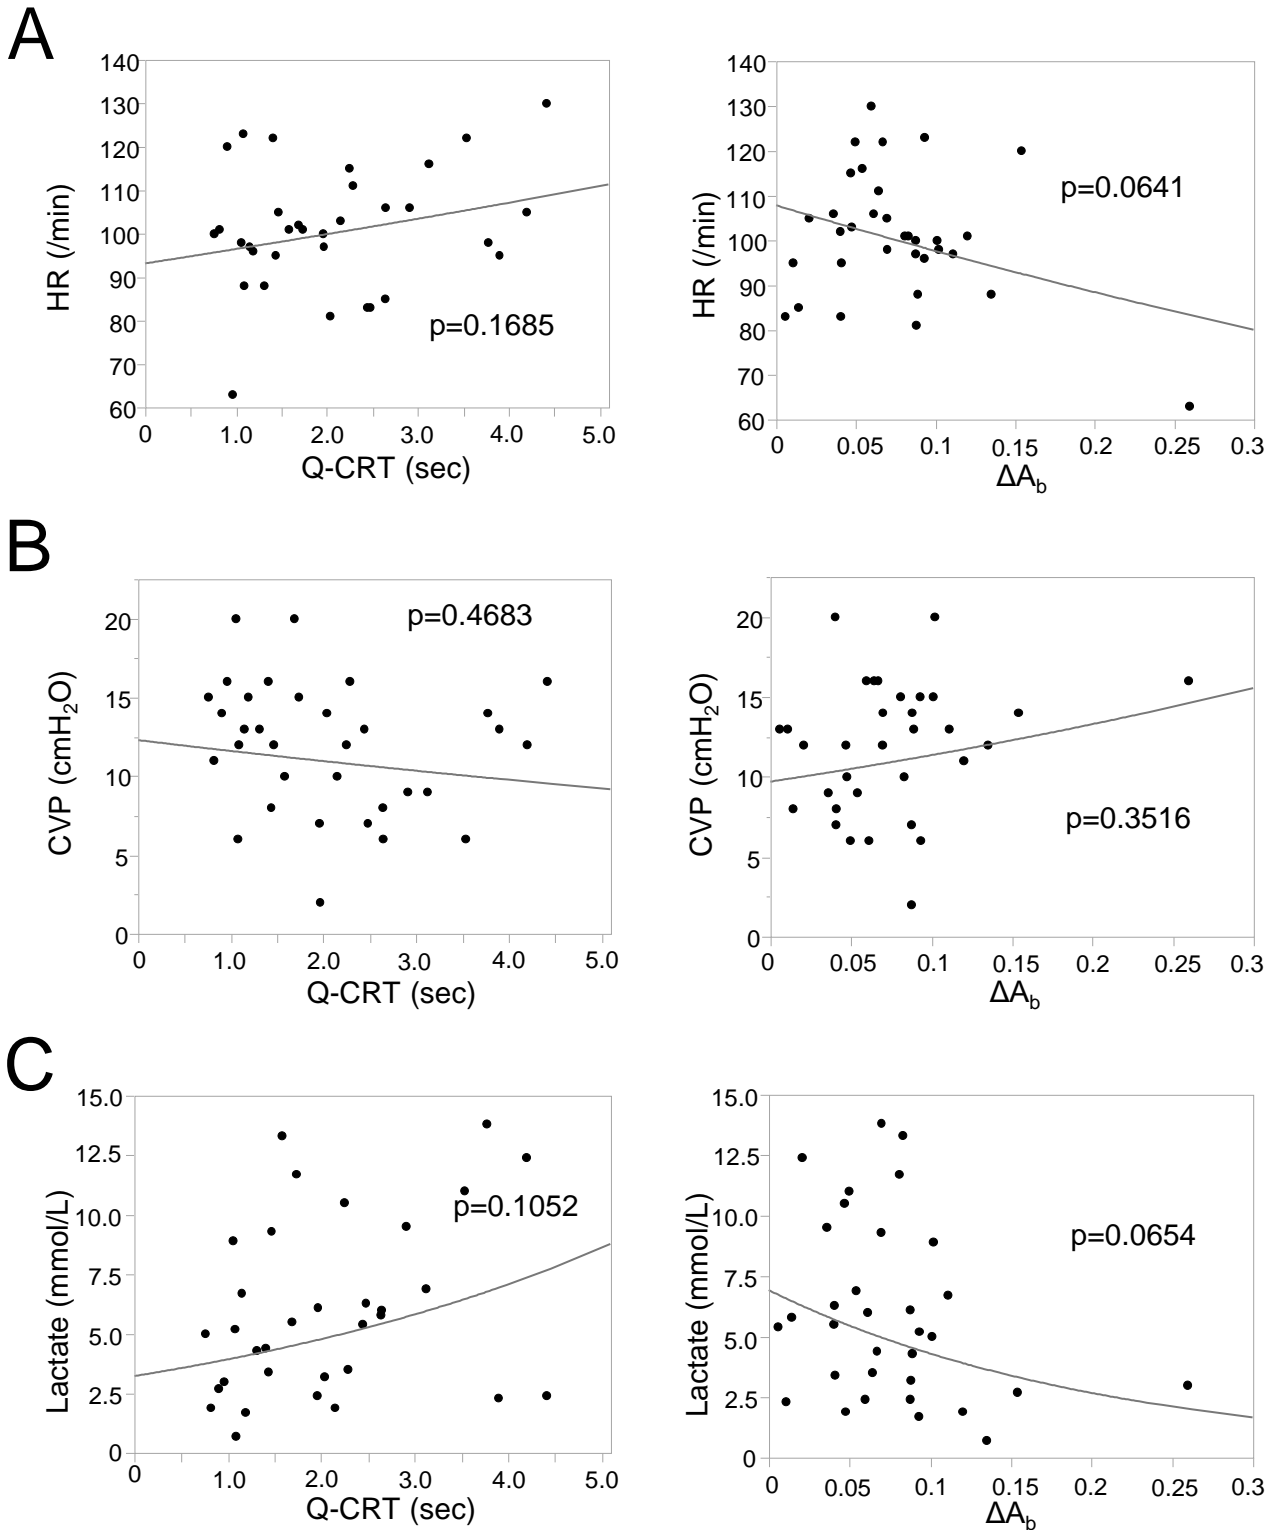

D

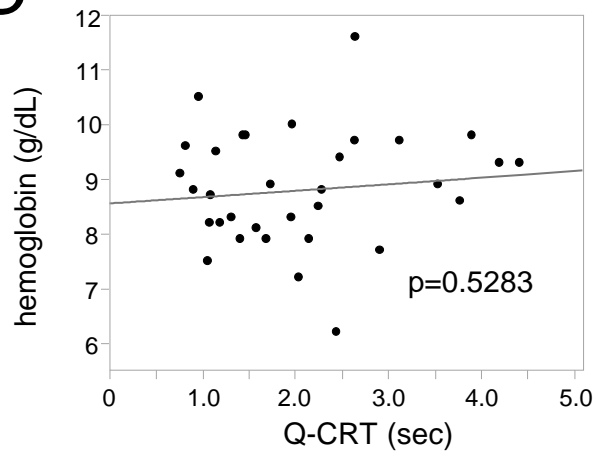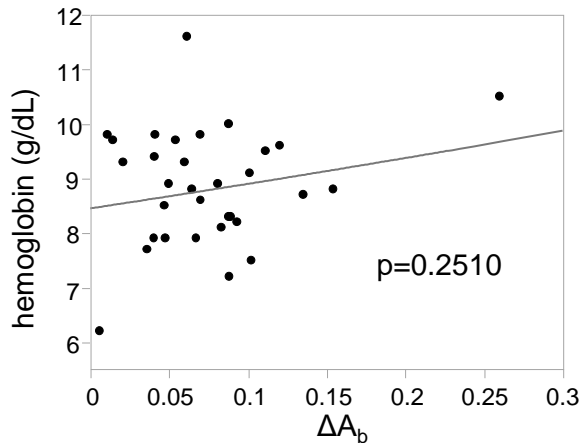

E

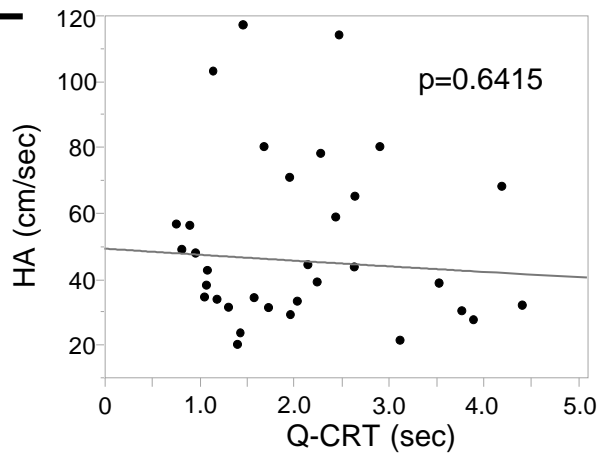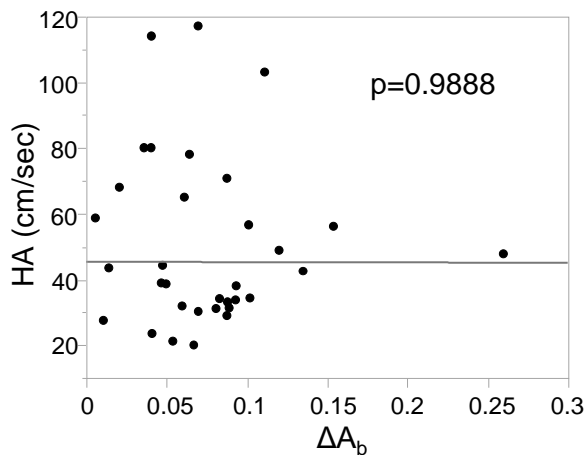

F

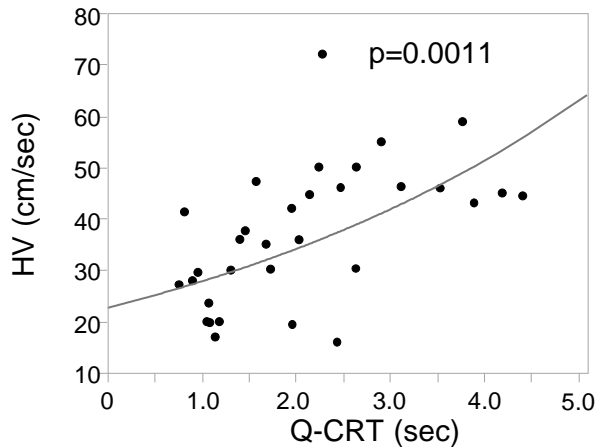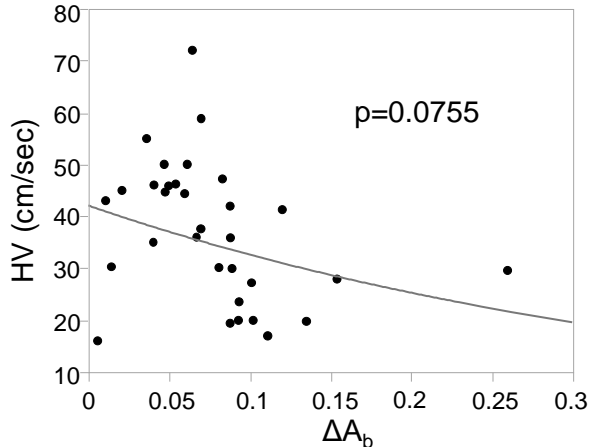

Supplement: MOESM2 [file 18429418]
