# Supplementary material for: Pulse oximetry-based capillary refilling evaluation predicts postoperative outcomes in liver transplantation: a prospective observational cohort study
Source: Springer Nature journal article supplement (doi:10.1186/s12871-020-01171-y), 2020-09-29

### Additional file 3.

### Correlations of liver blood flow with the outcomes

**A**

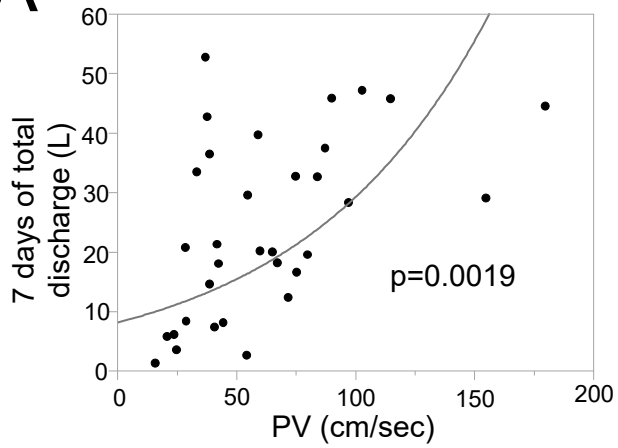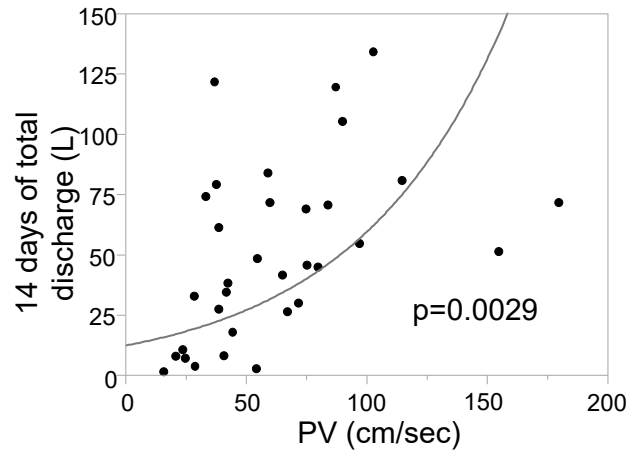

**B**

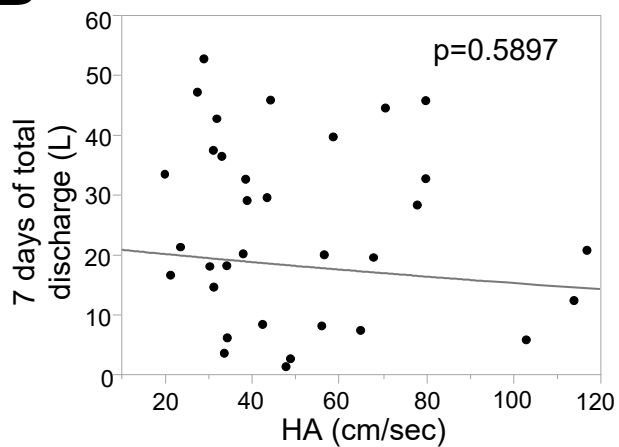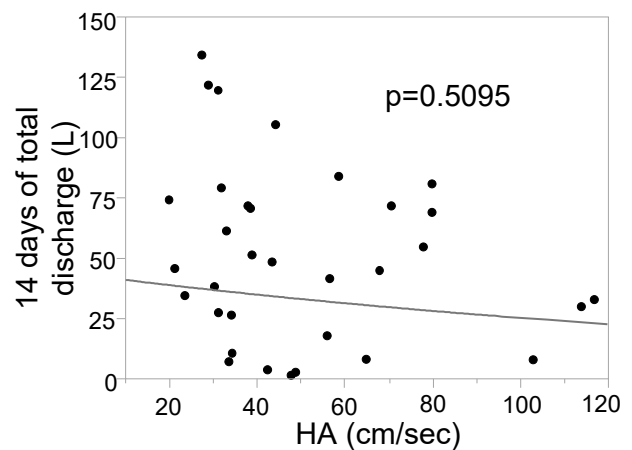

**C**

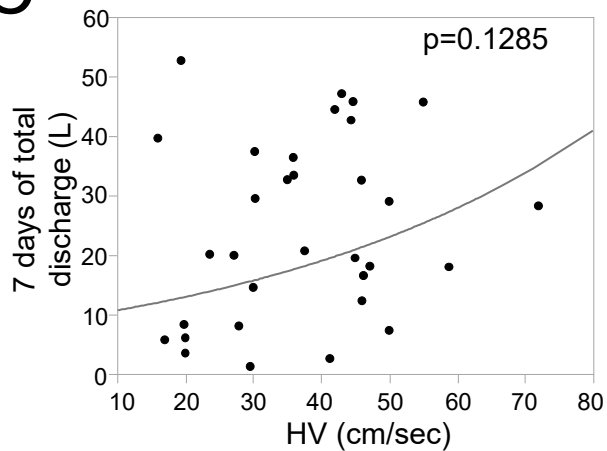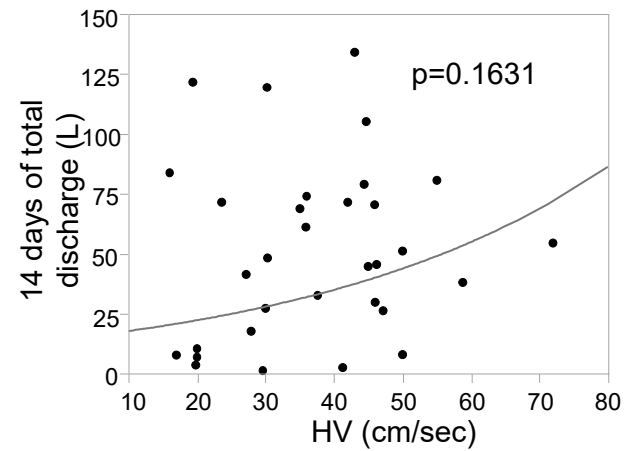

Supplement: MOESM3 [file 18429418]
