# Supplementary material for: Pulse oximetry-based capillary refilling evaluation predicts postoperative outcomes in liver transplantation: a prospective observational cohort study
Source: Springer Nature journal article supplement (doi:10.1186/s12871-020-01171-y), 2020-09-29
Supplement: MOESM5 [file 18429418]

## Additional file 5. Comparison of the non-massive ascites group with the massive ascites group.

|                 |                                      | Non-massive ascites<br>group (N=10) | Massive ascites<br>group (N=23) | p value |
|-----------------|--------------------------------------|-------------------------------------|---------------------------------|---------|
| Recipient       | body mass index (kg/m <sup>2</sup> ) | 23.2 (20.9–25.7)                    | 20.2 (18.9–24.2)                | 0.0379  |
| characteristics | primary disease                      |                                     |                                 | 1.0000  |
|                 | HBV positive                         | 1 (3.0%)                            | 1 (3.0%)                        |         |
|                 | HCV positive                         | 1 (3.0%)                            | 2 (6.1%)                        |         |
|                 | autoimmune disease<br>(PBC/PSC/AIH)  | 2 (6.1%)                            | 6 (18.2%)                       |         |
|                 | alcoholic                            | 1 (3.0%)                            | 4 (12.1%)                       |         |
|                 | others                               | 5 (15.2%)                           | 10 (30.3%)                      |         |
|                 | albumin (g/dL)                       | 2.7 (2.3–3.0)                       | 2.8 (2.4–3.3)                   | 0.3769  |
|                 | total bilirubin (mg/dL)              | 1.9 (0.6–3.8)                       | 2.5 (1.3–14.0)                  | 0.1080  |
|                 | PT-INR                               | 1.11 (1.00–1.44)                    | 1.28 (1.15–1.67)                | 0.0684  |
| Graft           | living donor                         | 6 (60%)                             | 21 (91.3%)                      | 0.0321  |
| characteristics | age (years)                          | 35 (31–58)                          | 45 (31–53)                      | 0.8984  |
|                 | male sex                             | 1 (14.3%)                           | 7 (31.8%)                       | 0.3660  |
|                 | graft volume vs. recipient's SLV (%) |                                     |                                 |         |
|                 | living donor                         | 49.5 (36.8–50.1)                    | 42.0 (35.5–51.5)                | 0.7706  |
|                 | brain death donor                    | 114.0 (98.3–127.4)                  | 132.9 (94.8–171.0)              | 1.0000  |
|                 | GRWR (%)                             |                                     |                                 |         |
|                 | living donor                         | 0.98 (0.64–1.03)                    | 0.82 (0.73–1.09)                | 0.9071  |
|                 | brain death donor                    | 2.88 (1.87–2.46)                    | 2.60 (1.87–3.32)                | 0.6434  |
| Operative       | operating time (hrs)                 | 10.1 (8.8–12.4)                     | 10.4 (9.6–11.5)                 | 0.7244  |
| factors         | anhepatic phase (min)                | 145 (132–172)                       | 149 (139–199)                   | 0.4046  |
|                 | graft ischemic time (min)            | 132 (124–159)                       | 141 (129–156)                   | 0.5193  |
|                 | blood loss (mL)                      | 2210 (1625–4005)                    | 3845 (2330–8160)                | 0.0848  |
|                 | blood transfusion (ml)               | 1940 (750–3300)                     | 3440 (1680–6240)                | 0.0600  |
|                 | intraoperative fluid balance (mL)    | 3523 (2809–5208)                    | 3907 (1932–4960)                | 0.9064  |

|               |                                              |                  |                  |         |
|---------------|----------------------------------------------|------------------|------------------|---------|
| Clinical      | body weight (kg)                             | 69.9 (58.2–74.6) | 57.8 (50.7–66.0) | 0.0379  |
| parameters at | central venous pressure (cmH <sub>2</sub> O) | 12 (10–15)       | 13 (8–15)        | 0.8905  |
| ICU admission | hemoglobin (mg/dL)                           | 9.6 (8.2–10.0)   | 8.8 (7.9–9.3)    | 0.1414  |
| Outcomes      | day14 discharge (mL)                         | 0 (0–504)        | 3219 (2301–4175) | <0.0001 |

Summary statistics are reported as No. (%), medians (lower and upper quartiles).

PBC; primary biliary cirrhosis, PSC; primary sclerosing cholangitis, AIH; autoimmune hepatitis, SLV; standard liver volume, GRWR; graft to recipient weight ratio
