# Supplementary material for: Pulse oximetry-based capillary refilling evaluation predicts postoperative outcomes in liver transplantation: a prospective observational cohort study
Source: Springer Nature journal article supplement (doi:10.1186/s12871-020-01171-y), 2020-09-29
Supplement: MOESM6 [file 18429418]

Additional file 6. The cut-off values of Q-CRT and  $\Delta A_b$  for each outcome

|                                     | Q-CRT                  |                  |             |             | $\Delta A_b$           |                  |             |             |
|-------------------------------------|------------------------|------------------|-------------|-------------|------------------------|------------------|-------------|-------------|
|                                     | AUC<br>(95% CI)        | cut off<br>value | sensitivity | specificity | AUC<br>(95% CI)        | cut off<br>value | sensitivity | specificity |
| Length of<br>ICU stay<br>(day)      | 0.930<br>(0.777–0.981) | 1.964            | 0.87        | 1.00        | 0.870<br>(0.684–0.954) | 0.0697           | 0.83        | 0.80        |
| Length of<br>hospital stay<br>(day) | 0.896<br>(0.688–0.971) | 2.478            | 0.87        | 0.80        | 0.857<br>(0.652–0.950) | 0.0473           | 0.83        | 0.80        |
| 7 days total<br>discharge (L)       | 0.935<br>(0.796–0.981) | 1.406            | 0.83        | 1.00        | 0.909<br>(0.748–0.971) | 0.0401           | 0.74        | 1.00        |
| 14 days total<br>discharge (L)      | 0.974<br>(0.876–0.995) | 0.760            | 0.87        | 1.00        | 0.965<br>(0.855–0.992) | 0.0697           | 0.87        | 1.00        |

95% CI, 95% confidence interval
