# Supplementary material for: Pulse oximetry-based capillary refilling evaluation predicts postoperative outcomes in liver transplantation: a prospective observational cohort study
Source: Springer Nature journal article supplement (doi:10.1186/s12871-020-01171-y), 2020-09-29

# Additional file 7.

## Serial measurements of quantitative capillary refill time and $\Delta A_b$

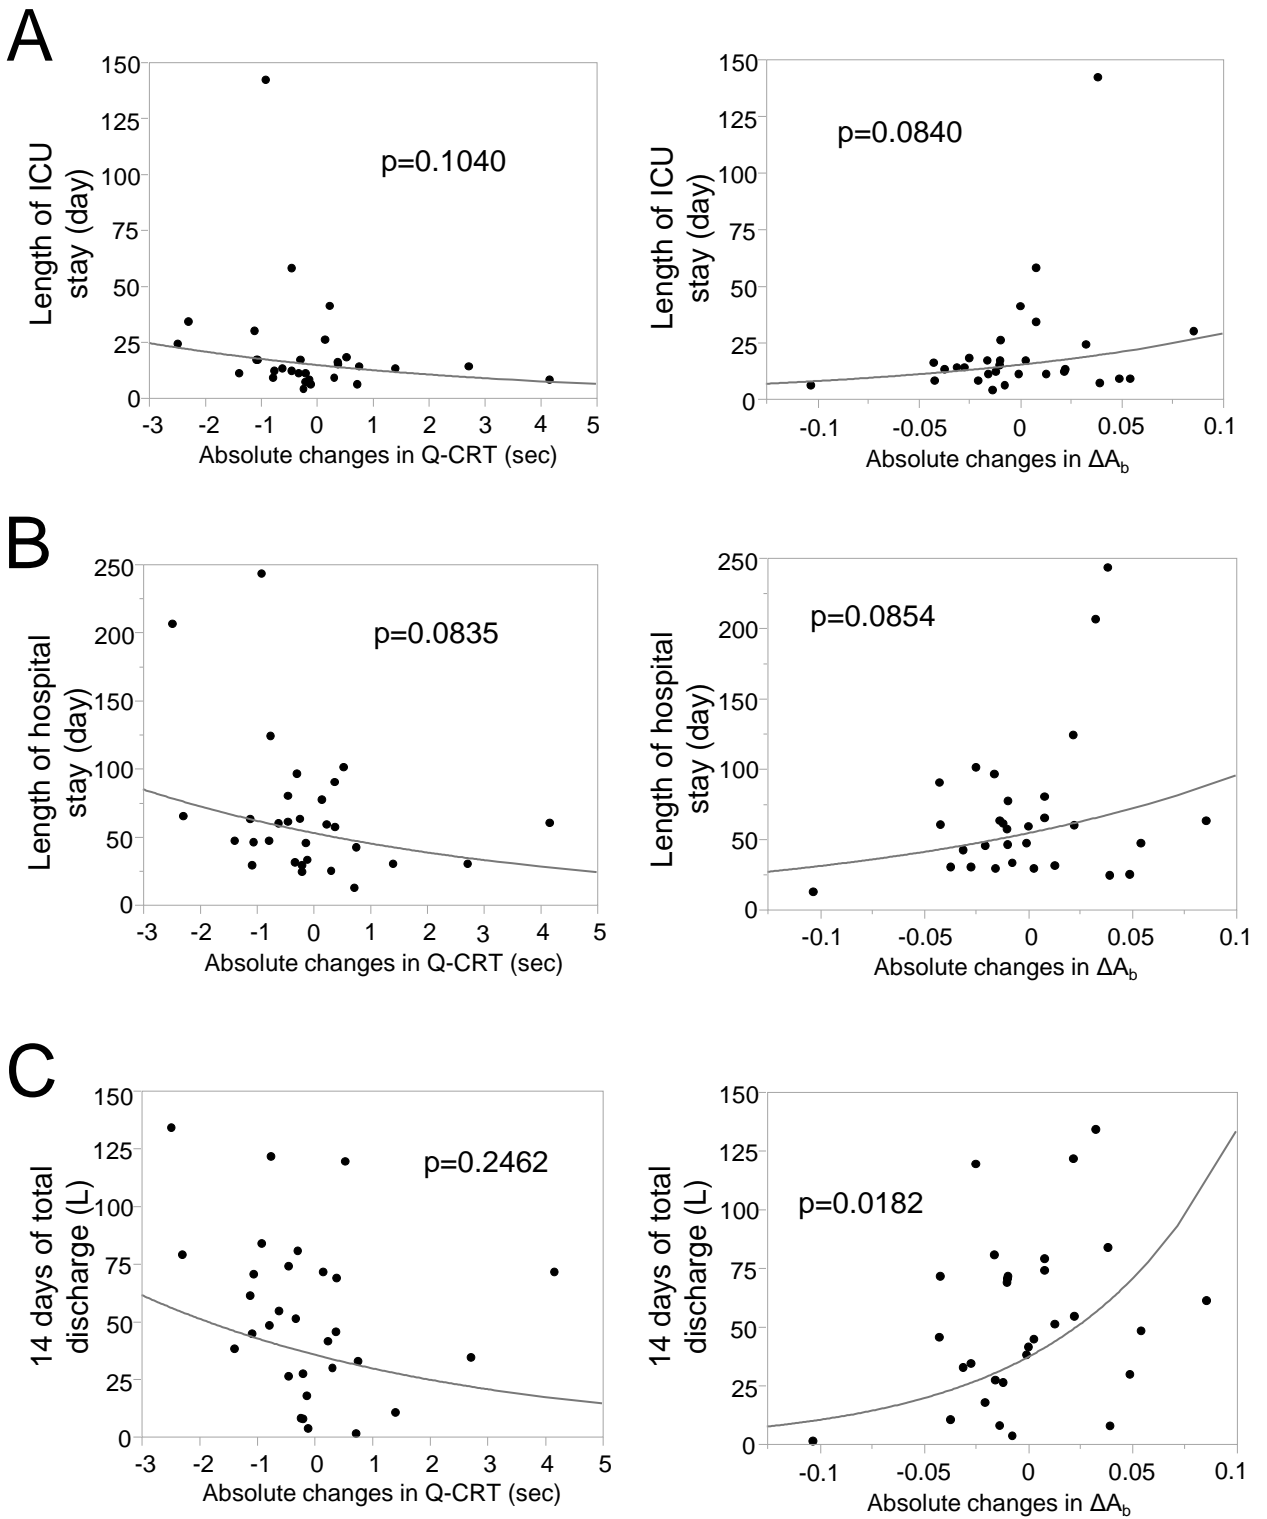

Supplement: MOESM7 [file 18429418]
